# Supplementary figures and images for: Phytochemical Characterization and Biological Evaluation of Origanum vulgare L. Essential Oil Formulated as Polymeric Micelles Drug Delivery Systems
Source: MDPI journal article supplement (doi:10.3390/pharmaceutics14112413), 2022-11-08

**A**

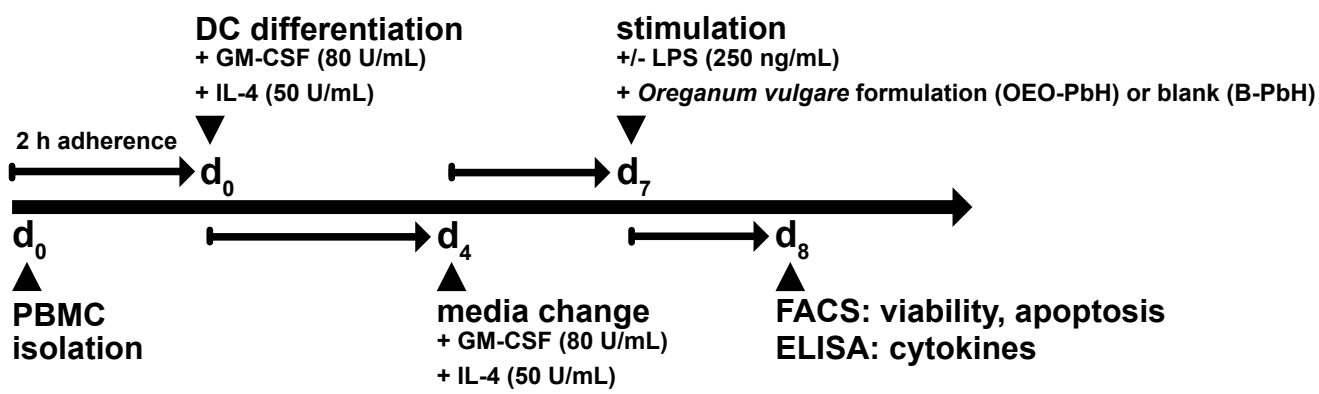

Supplement: s1 [file s1]

**A**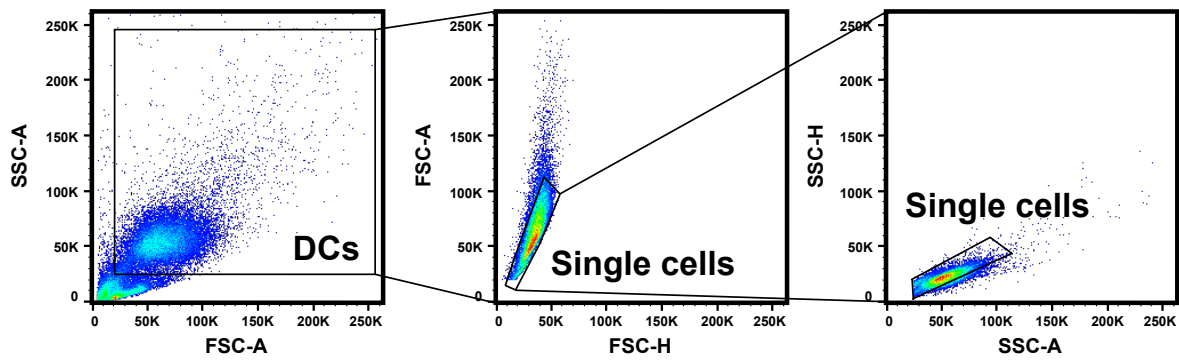**B**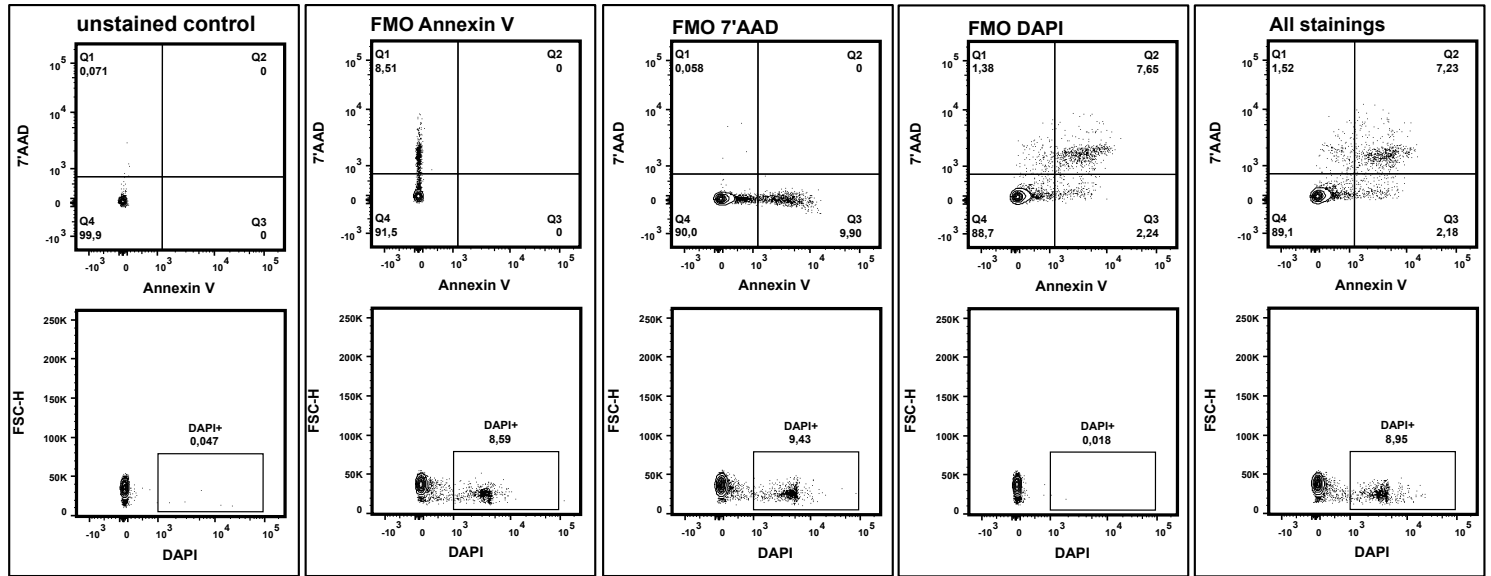

Supplement: s1 [file s1]
